# Supplementary material for: LncRNA SPANXA2-OT1 Participates in the Occurrence and Development of EMT in Calcium Oxalate Crystal-Induced Kidney Injury by Adsorbing miR-204 and Up-Regulating Smad5
Source: Frontiers journal article supplement (doi:10.3389/fmed.2021.719980), 2021-09-27
Supplement: Table_4.xlsx [file Table_4.xlsx]

## Sheet: up_COM_vs_Control
# Fold Change cut-off: 1.5 # P-value cut-off: 0.05 # Condition pairs: COM_vs_Control # Column A: ProbeName it represents probe name. # Column B: P-value, P-value calculated from unpaired t-test. # Column C: FDR, FDR is calculated from Benjamini Hochberg FDR. # Column D: Fold Change, the absolute ratio (no log scale) of normalized intensities between two conditions. # Column E: Regulation, it depi…
COM_vs_Control 1.5 fold up regulated LncRNAs
	P-value and FDR		Fold change and Regulation		Annotations																				Group--Raw Intensity		Group--Normalized Intensity		Raw Intensity						Normalized Intensity
ASHGV40022130	0.0101941	0.198433	3.03154	up	noncoding	long noncoding	Gold	NR_126414	ABCA9-AS1	RefSeq	523	chr17	+	67000854	67014464	CCTCCTCTTTAGTTGCTTTGTGCAACAAACATTAAGGTTAAGTAAACTTGCAGAATCTAT	104355297	natural antisense	ENST00000370732	ABCA9		-	66970773	67057136	27.6323	8.25359	4.67278	3.07273	17.993	30.112	34.7919	6.04421	9.02196	9.69458	4.28401	4.65477	5.07957	2.55758	3.23617	3.42445
ASHGV40023335	0.0291699	0.300753	2.90385	up	noncoding	long noncoding	Gold	NR_131768	LOC105667213	RefSeq	955	chr18	+	42111743	42133868	TAGCTGGCTACAGATACCCAATGGTTCATCCAGAAGTTTGTTCCAGCTAACAGCAGTTGT	105667213	intergenic							36.5899	10.8266	5.00175	3.46379	16.9292	47.5136	45.3268	10.8049	13.9434	7.73138	4.19896	5.34083	5.46547	3.43637	3.86868	3.0863
ASHGV40057650	0.0333268	0.308559	2.5742	up	noncoding	long noncoding	Gold	NR_037183	SPANXA2-OT1	RefSeq	1698	chrX	+	140590842	140738069	TTCATACTTGGTATTTGAAAATACGCTAGCACAGCTCTTGGAAATAAACAGTAATCTAAC	619455	intron sense-overlapping	NM_013453	SPANXA1	sperm protein associated with the nucleus, X-linked, family member A1	+	140677834	140678899	30.8015	11.7281	4.87004	3.50591	26.4962	33.2922	32.6162	7.23958	10.1772	17.7676	4.82938	4.79808	4.98265	2.82679	3.40487	4.28607
ASHGV40010789	0.000583373	0.0895354	2.24457	up	noncoding	long noncoding	Reliable	ENST00000536330	RP11-955H22.1	GENCODE	724	chr12	-	127759011	127768828	TGGCTCTTCGAAGAGTAGCAGCTGATGAACATTACTCCGGCAAACAATTTTCTCTGCTAG		intergenic							829.898	367.877	9.68996	8.52352	799.592	872.919	817.184	412.659	388.242	302.73	9.6367	9.73552	9.69765	8.65993	8.61396	8.29666
ASHGV40001891	0.0379445	0.322918	2.12811	up	noncoding	long noncoding	Gold	ENST00000532735	RP11-748C4.1	GENCODE	522	chr11	+	10170738	10186656	GTTGCCAAAGATAGTCATCCAAAACCTTGGAACAACTCTGAAGGTCCCTCATATGGATTC		intronic antisense	NM_030962	SBF2	SET binding factor 2	-	9800213	10315754	40.6664	17.9746	5.26195	4.17237	30.4414	47.8651	43.6926	11.575	18.6935	23.6555	5.01896	5.35339	5.41348	3.541	4.29279	4.68333
ASHGV40000817	0.00113302	0.0972076	2.0381	up	noncoding	long noncoding	Gold	ENST00000435984	AC104135.3	GENCODE	565	chr2	+	75145274	75159921	AGGCAGAATGGAAATAAAACTTTAACCAAAAGAGCATGGGCAGATATTTCCCGGATCTGA		intergenic							49.7638	22.3359	5.57046	4.54323	45.7012	58.5194	45.0708	25.4702	23.1411	18.3964	5.59078	5.66264	5.45797	4.69373	4.60145	4.33452
ASHGV40000444	0.00108215	0.0941403	2.02589	up	noncoding	long noncoding	Gold	NR_125792	LINC01291	RefSeq	494	chr2	+	75136257	75165545	TGACTGCACCACCCAGTAAAAAGACATCCCTTAACTATGGCAAAACAACAACAACAACGA	102724515	intergenic							116.337	54.3297	6.82667	5.80811	123.018	118.247	107.745	59.5925	57.4242	45.9725	6.98227	6.76705	6.7307	5.91274	5.88638	5.62522
ASHGV40041630	0.0108925	0.202847	2.02285	up	noncoding	long noncoding	Gold	ENST00000506429	CTD-2130F23.1	GENCODE	487	chr5	+	37953503	37967066	GAGGTTTTTGCACTGGGGACTGAAAAAGTTATCAGTGTTAATAAAAAGAAGTTTTCCTGA		intergenic							33.3298	14.818	4.96352	3.94713	23.7575	39.5376	36.6942	12.5749	14.4634	17.4158	4.67423	5.0588	5.15754	3.66284	3.92257	4.256
ASHGV40004879	0.00513427	0.159475	2.01565	up	noncoding	long noncoding	Reliable	uc001kyj.3	BC042079	UCSC_knowngene	1278	chr10	-	106424365	106425958	GCGCTGCAAATCTTCACTGCCAACTTCAACTACTCCAAAATAAAGTCAAAATTTTAAAAG		intronic antisense	ENST00000369701	SORCS3	sortilin-related VPS10 domain containing receptor 3	+	106400858	107024993	43.1029	19.3355	5.34684	4.3356	35.2759	54.8754	39.1574	16.4338	22.2977	19.275	5.22672	5.56819	5.2456	4.05949	4.54674	4.40057
ASHGV40056007	0.0467585	0.350417	2.00704	up	noncoding	long noncoding	Gold	NR_110375	THRIL	RefSeq	1981	chr12	-	125509988	125511969	AAATAAAGCTCACAGTTTGGGAACATGAAAATAACGCACACAGACCTCACCCACCAATCC	102659353	natural antisense	NM_080626	BRI3BP	BRI3 binding protein	+	125478193	125510349	91.3456	39.9288	6.3852	5.38013	53.4622	138.864	81.7107	38.4855	39.5458	41.7551	5.8134	7.01686	6.32534	5.28734	5.36406	5.489
ASHGV40022280	1.2546e-05	0.0324322	1.93113	up	noncoding	long noncoding	Reliable	ENST00000606790	RP11-474O21.5	GENCODE	345	chr1	-	12678905	12679250	AAATTGGTGTCAGTCAAGGTAATTCTAGCTCAGATGAGCAATAAATATGCTCCCAGCTAA		intergenic							2989.73	1530.42	11.5316	10.5821	2945.95	3101.02	2922.23	1667.04	1501.81	1422.42	11.5153	11.5361	11.5434	10.6514	10.5587	10.5364
ASHGV40042940	0.00179974	0.112229	1.9153	up	noncoding	long noncoding	Reliable	ENST00000566733	RP1-140K8.5	GENCODE	7070	chr6	-	3905143	3912213	GAGTATACAGGTGTCTGTTGTGCTGTTTTCTGTGTGTTTGAATGGTTTCATAATTTTTAG		intergenic							328.302	166.68	8.3356	7.39803	292.923	374.001	317.982	181.867	176.859	141.314	8.20159	8.49755	8.30766	7.49812	7.48386	7.21212
ASHGV40000903	0.0400302	0.330877	1.88849	up	noncoding	long noncoding	Gold	ENST00000440477	RP11-46E17.6	GENCODE	770	chr22	-	27853207	27856021	TGTTGTTTCAAGCATCTCTGCTTTGAGTTCATGCTGCCTATTGGATGGAATCTCAGAGGG		intergenic							43.7572	20.6443	5.33704	4.41981	27.2886	50.2451	53.7379	17.2545	19.9834	24.695	4.87019	5.42631	5.71461	4.12861	4.38369	4.74712
ASHGV40036543	0.00598933	0.166492	1.87211	up	noncoding	long noncoding	Gold	NR_002811	NPHP3-AS1	RefSeq	2507	chr3	+	132441185	132593050	GAAAGAGTCTAAAGCTTTTTGAAACCTCTGTACAAGGACATTTCAACCTCATTGTTTACA	348808	natural antisense	ENST00000326682	NPHP3		-	132399453	132441276	29.1181	14.0946	4.78247	3.87781	24.5586	34.7126	28.083	11.7481	14.8874	15.6483	4.72107	4.86245	4.7639	3.55902	3.96545	4.10894
ASHGV40029461	0.00243342	0.125329	1.87146	up	noncoding	long noncoding	Gold	ENST00000419223	AC023347.1	GENCODE	440	chr2	+	127069990	127086709	GAATCCATGGCTTTCAGTGTCTGGCCCTATTTCTTCTAGTTCAAGAATTTTAAGAAAAAA		intergenic							131.91	66.7816	7.00383	6.09967	108.936	156.565	130.229	75.5936	64.1619	60.5895	6.81039	7.1989	7.0022	6.24132	6.04073	6.01697
ASHGV40001926	0.0209018	0.261555	1.85178	up	noncoding	long noncoding	Reliable	ENST00000536492	RP11-434C1.2	GENCODE	188	chr12	-	11694328	11708772	TTTTCAAGAAAACAGGTTTTTGGCACTGTGGTGAGGATGCAAAGAGAAAGTGGCTGCCTG		intergenic							37.2393	17.9761	5.11482	4.22591	29.3959	51.1654	31.1565	14.8819	18.4499	20.5965	4.9701	5.45596	4.91841	3.91161	4.27602	4.49011
ASHGV40020135	0.018179	0.245399	1.85063	up	noncoding	long noncoding	Reliable	ENST00000455363	RP11-358H9.1	GENCODE	316	chr1	-	222626081	222628047	TCACACATGTCCAGTGAGAAGAAATGATGTGTGCTACAGGACTTCAACTGAGGAAGGGAT		intergenic							26.0052	12.4535	4.58784	3.69982	17.9868	34.1162	25.9126	10.5056	12.9402	13.9146	4.28359	4.8355	4.64443	3.39081	3.76064	3.94802
ASHGV40052258	0.0210276	0.261555	1.84569	up	noncoding	long noncoding	Gold	ENST00000437135	RP11-477J21.6	GENCODE	838	chr9	-	124042140	124045008	TTCTCAGGCTGACAGTAAATGGTTCAGACAGTCCTGATGACTTGTGCATTGTGACTGACA		intronic antisense	ENST00000373823	GSN		+	123970077	124095121	38.8331	18.8124	5.17687	4.29272	27.4554	52.147	36.897	15.5841	21.8955	18.9576	4.87828	5.48593	5.16641	3.97704	4.52233	4.37878
ASHGV40032740	0.00282297	0.128532	1.84222	up	noncoding	long noncoding	Gold	ENST00000442785	AP001059.5	GENCODE	523	chr21	+	45670695	45671403	AATACCGCCTTTTAGAGGAAGCTCCAGAGGACACGTGAGCTGCAGTGATGTGGGCACGCT		natural antisense	ENST00000431166	DNMT3L		-	45670692	45681765	40.9663	20.2518	5.2859	4.40445	34.3131	44.6619	43.9239	21.7433	22.4952	16.5169	5.18976	5.2456	5.42235	4.47162	4.56152	4.18022
ASHGV40015082	0.00123638	0.0999702	1.82886	up	noncoding	long noncoding	Gold	NR_039985	FLJ22447	RefSeq	1386	chr14	+	62037257	62121431	TATGTTGAACAGCACTAATTTTTTCACTTGGAGCTAGCACATGTTTATGACTAGTACAAG	400221	exon sense-overlapping	ENST00000556717	RP11-47I22.3		+	62114137	62120719	727.552	391.992	9.49259	8.62164	668.938	783.251	730.466	443.957	392.773	339.244	9.37572	9.57785	9.52418	8.76893	8.63207	8.46392
ASHGV40030171	0.00147344	0.103826	1.81283	up	noncoding	long noncoding	Reliable	ENST00000438633	AC114765.2	GENCODE	347	chr2	+	220992266	221077212	GAACAGACGTCTTCTGCATTAAAAAAGGACATAGGCATGCATTAAATCCCTTATGTCTTA		intergenic							49.7121	25.1365	5.57252	4.71427	43.1079	56.7629	49.2653	26.2997	21.852	27.2578	5.51199	5.6163	5.58926	4.73838	4.52011	4.88433
ASHGV40033639	0.00841306	0.184795	1.80562	up	noncoding	long noncoding	Reliable	ENST00000434942	RP1-90G24.10	GENCODE	876	chr22	+	32601101	32665653	AATCAAGGAACTGGAGCCCCAGCTGACAATTCTATATCAGAACCCAAAGACGCTGAAGTT		intronic antisense	NM_014227	SLC5A4	solute carrier family 5 (glucose activated ion channel), member 4	-	32614462	32651318	99.3444	51.4811	6.5868	5.7343	77.7902	111.58	108.663	44.3673	54.8566	55.2194	6.33786	6.67876	6.74377	5.49052	5.82382	5.88857
ASHGV40030042	0.000107243	0.0719474	1.80451	up	noncoding	long noncoding	Gold	ENST00000429730	AC079767.4	GENCODE	492	chr2	+	208527098	208531748	TGATTTGGAGGCGTGTTCTCATTCAAAACCTTGCAAAATATAATTTCTTCTTGTCTGGGA		intergenic							139.122	73.5341	7.08901	6.2374	130.012	145.129	142.224	75.6222	78.3391	66.6411	7.05967	7.08104	7.12631	6.24233	6.32523	6.14464
ASHGV40013356	0.024127	0.277004	1.79032	up	noncoding	long noncoding	Gold	NR_120400	LOC103191607	RefSeq	839	chr13	+	52908429	52916018	AAGTGAGTGTAAGCAGTAAATGGAACAACAAGCTTTCAGAGTCACTGCAGGGCAAGAGCT	103191607	intergenic							33.6574	16.579	4.95716	4.11695	22.921	46.2526	31.7986	16.0491	14.6637	19.0243	4.62275	5.30003	4.9487	4.02366	3.94394	4.38324
ASHGV40019527	0.00796923	0.178838	1.76704	up	noncoding	long noncoding	Reliable	ENST00000602789	RP11-568J23.4	GENCODE	498	chr16	+	85776892	85777831	TATTCCACACGCCAGAATTCTAGATTGTTTGAGTTTGTTACAAACACACGTATCTTTGTA		intronic antisense	NM_206967	C16orf74	chromosome 16 open reading frame 74	-	85741123	85784689	28.7135	14.3265	4.73342	3.91209	21.7268	38.9385	25.4751	16.2936	13.7642	12.9218	4.54431	5.03663	4.61933	4.04616	3.84716	3.84294
ASHGV40044519	0.00014805	0.0719474	1.76096	up	noncoding	long noncoding	Reliable	ENST00000603791	RP11-420L9.5	GENCODE	2761	chr6	+	3751344	3754105	ATGTTTCCTGTGTAATTTTGTATAGGGGAATAGGGGCCGTGGGAACTGGAAGTAAACAGC		natural antisense	NM_183373	PXDC1	PX domain containing 1	-	3722835	3752246	304.808	167.129	8.22813	7.41176	316.474	306.841	291.109	163.944	164.921	172.52	8.3089	8.20301	8.17248	7.35804	7.38564	7.49162
ASHGV40003660	0.0478039	0.351364	1.72215	up	noncoding	long noncoding	Gold	NR_028395	TSNAX-DISC1	RefSeq	3454	chr1	+	231664398	231954990	AACTCAGAAATATTTGGCAGCCGGGATTGCTTACCACCTGCAGCGTGCTTTCGGAGGCGG	100303453	exon sense-overlapping	ENST00000366637	DISC1		+	231762560	232176873	46.5772	24.3115	5.43666	4.65244	30.7984	51.5606	57.3728	24.9586	29.2445	18.7316	5.03597	5.46727	5.80674	4.66151	4.93537	4.36045
ASHGV40002391	0.0214063	0.263561	1.70387	up	noncoding	long noncoding	Reliable	ENST00000573301	RP11-700H6.4	GENCODE	492	chr17	-	48986997	48987593	TGGCACACAGGGACTCTGATCAGGGGAGGGAAAGCAGTGAGAGAGCATAGCTTCCCAGAG		intergenic							44.7353	23.3258	5.3764	4.60759	31.5064	61.4358	41.2638	23.9177	25.6578	20.4018	5.0685	5.73635	5.32435	4.59922	4.74638	4.47716
ASHGV40031304	0.0413853	0.332919	1.68038	up	noncoding	long noncoding	Reliable	uc001cva.1	AX748428	UCSC_knowngene	1871	chr1	+	53580247	53584281	ACCTGAACACCCAGCCCAGTGGATCCTTAACCTTCTGAGTGAAGCACTGTGGAGTTCCAC		natural antisense	ENST00000371491	SLC1A7		-	53573599	53608289	47.1416	24.5306	5.43199	4.6832	32.465	69.565	39.3948	24.1535	25.1013	24.3371	5.11482	5.926	5.25514	4.61534	4.71123	4.72303
ASHGV40019609	0.000654378	0.0895354	1.67904	up	noncoding	long noncoding	Gold	NR_110932	LOC101927817	RefSeq	1816	chr16	+	89497325	89520902	CTGGCTCACCACCCAGCTAAGAGTTATGGCCTAAATCAGAGGTGATCGGGGTGATCAGAG	101927817	intronic antisense	NM_001256183	ANKRD11		-	89334028	89556969	24.0707	12.9117	4.50575	3.75812	20.4194	28.2881	23.5047	14.5793	11.857	12.2987	4.46002	4.55558	4.50165	3.87934	3.62804	3.76698

## Sheet: down_COM_vs_Control
# Fold Change cut-off: 1.5 # P-value cut-off: 0.05 # Condition pairs: COM_vs_Control # Column A: ProbeName it represents probe name. # Column B: P-value, P-value calculated from unpaired t-test. # Column C: FDR, FDR is calculated from Benjamini Hochberg FDR. # Column D: Fold Change, the absolute ratio (no log scale) of normalized intensities between two conditions. # Column E: Regulation, it depi…
COM_vs_Control 1.5 fold down regulated LncRNAs
	P-value and FDR		Fold change and Regulation		Annotations																				Group--Raw Intensity		Group--Normalized Intensity		Raw Intensity						Normalized Intensity
ProbeName	P-value	FDR	Fold Change	Regulation	type	transcript_type	lncRNA_level	seqname	GeneSymbol	source	RNAlength	chrom	strand	txStart	txEnd	Sequence	EntrezID	relationship	Associated_gene_acc	Associated_gene_name	Associated_protein_name	Associated_gene_strand	associated_gene_start	Associated_gene_end	group-COM(raw)	group-Control(raw)	group-COM(normalized)	group-Control(normalized)	[COM_1, COM](raw)	[COM_2, COM](raw)	[COM_3, COM](raw)	[Control_1, Control](raw)	[Control_2, Control](raw)	[Control_3, Control](raw)	[COM_1, COM](normalized)	[COM_2, COM](normalized)	[COM_3, COM](normalized)	[Control_1, Control](normalized)	[Control_2, Control](normalized)	[Control_3, Control](normalized)
ASHGV40016242	0.000610578	0.0895354	3.27083	down	noncoding	long noncoding	Gold	NR_110811	LINC01363	RefSeq	1854	chr1	-	167144598	167165042	CTCATTCTTGCCATAGAATGCCTTGTCCAATTATATGCAAGCTTAGTACATGTTGTTAAA	101928484	intergenic							6.83224	19.1503	2.62002	4.32968	5	8.10076	7.39597	20.0167	20.3247	17.1096	2.32981	2.62273	2.90751	4.34751	4.40936	4.23216
ASHGV40009583	0.00467506	0.153222	3.24427	down	noncoding	long noncoding	Reliable	ENST00000539009	RP11-277P12.10	GENCODE	649	chr12	-	10485459	10490891	CCACTTTGCAGTCCTGTTGGATCTATATCTTGAGAAATAAATTAAAGAGCTTTTCCCTCC		intergenic							9.22289	26.6518	3.10528	4.80317	11.657	9.18342	6.82826	26.1285	28.795	25.0318	3.68957	2.82644	2.79984	4.72934	4.91539	4.76478
ASHGV40011276	0.00107426	0.0941403	2.93216	down	noncoding	long noncoding	Reliable	ENST00000553006	RP11-547C5.1	GENCODE	256	chr12	+	43359924	43361156	CACAGGTCATCATGACTTGATGAATGAATATCATATTGGTTAATTCCTGCGGCTTAATAA		intergenic							80.0105	227.696	6.2763	7.82826	77.7561	81.2633	81.0121	269.396	242.135	171.557	6.33766	6.17805	6.31318	8.061	7.94248	7.48131
ASHGV40007210	0.00133165	0.100511	2.9154	down	noncoding	long noncoding	Gold	ENST00000504911	CTD-3074O7.2	GENCODE	580	chr11	-	66326336	66327855	CCTTTGTTCACTACAGAAATCCTCGACAGAACAATGAATGGATGTTTCTATCCAGAGTAA		natural antisense	NM_001104	ACTN3	actinin, alpha 3 (gene/pseudogene)	+	66314311	66330800	9.75677	25.9761	3.21301	4.7567	10.2091	9.89676	9.16443	24.598	30.0562	23.2741	3.49993	2.94396	3.19513	4.6407	4.97102	4.65837
ASHGV40019384	0.0088662	0.187916	2.75068	down	noncoding	long noncoding	Gold	NR_027756	HCCAT5	RefSeq	1114	chr16	+	73126247	73127672	GGCGGCGTTCCCAGGAAAATTCTAACTAATCATAAAAATAGAAAGAAAAACGCAACCTAA	283902	intergenic							16.6418	41.1311	3.91804	5.37783	11.3689	24.2691	14.2874	47.9372	47.5977	27.8585	3.65305	4.31121	3.78986	5.60475	5.61396	4.91478
ASHGV40003444	0.0391266	0.327987	2.61496	down	noncoding	long noncoding	Gold	NR_015425	LINC00705	RefSeq	1045	chr10	+	4698347	4704606	AGAAAACTGGCTTTTTGGATTGGCTCACAGTTTTCCTACTTTTCTGTCCTGTCAGTTGAG	338588	intergenic							8.19366	18.851	2.91646	4.30325	12.6598	6.14078	5.78039	17.6744	21.5113	17.3672	3.80503	2.37134	2.573	4.16189	4.49589	4.25197
ASHGV40011533	0.0132933	0.217841	2.42275	down	noncoding	long noncoding	Gold	NR_110725	HIPK1-AS1	RefSeq	2125	chr1	-	114466622	114471880	AAGAAGGCGAGAAGGGGCAGATATGTGAAATACATCCTCCTAAACCAAGTCAGAGCAACT	101928846	bidirectional	ENST00000369554	HIPK1		+	114471995	114520422	19.5787	41.7627	4.16374	5.44039	22.7358	23.4337	12.5666	39.8143	39.9281	45.5458	4.60968	4.25833	3.62322	5.33298	5.37706	5.61113
ASHGV40051767	0.00045952	0.0830258	2.37237	down	noncoding	long noncoding	Gold	NR_121572	GXYLT1P3	RefSeq	2292	chr9	-	43003238	43008397	TCATTATGACCGAAAATGTAGTTCACACAATCATGATGCTCTCTTTATTAGGTGTTACTG	100132541	intergenic							10.0003	21.1723	3.22333	4.46966	7.84017	13.3381	8.82277	24.0994	20.8825	18.5349	3.1262	3.40231	3.14149	4.61115	4.45281	4.34502
ASHGV40016986	0.00925889	0.190257	2.3284	down	noncoding	long noncoding	Gold	NR_026949	EWSAT1	RefSeq	2527	chr15	+	69373189	69388163	GGTGTCTCCTACTTTTACTAAAAATGGAATTTGTGTTTTTATCGCTCAAGTCCTTTTTGC	283673	intergenic							49.6205	107.548	5.54053	6.75987	48.8782	63.389	36.5942	128.656	84.8301	109.158	5.68752	5.781	5.15307	7.00479	6.43361	6.84122
ASHGV40050402	0.0187047	0.248684	2.27782	down	noncoding	long noncoding	Reliable	ENST00000607735	CTD-2168K21.2	GENCODE	490	chr8	+	24814134	24814624	TTACGGTGATGGTGCGGCTAGGGAATTTTAGATACAAATAAATAGGCTAGGTTATGTGTA		natural antisense	NM_006158	NEFL	neurofilament, light polypeptide	-	24808468	24814383	15.7437	33.5657	3.88085	5.06851	14.9189	19.2825	13.0297	42.8375	37.186	20.6736	4.02078	3.95567	3.66612	5.43831	5.27231	4.49492
ASHGV40005880	0.0107536	0.201798	2.24634	down	noncoding	long noncoding	Reliable	ENST00000608229	RP11-479O17.10	GENCODE	5001	chr10	+	81727968	81732969	CCCTTTAAACATTGAAACAGAAAGAAAATGACAGTAAAAGTTACAATAGCCCCTCCATGA		intronic antisense	ENST00000444384	SFTPD		-	81701204	81742370	22.552	45.6368	4.391	5.55858	26.9708	23.4621	17.2231	52.7571	44.9376	39.2159	4.85511	4.26047	4.05743	5.74128	5.53303	5.40144
ASHGV40056863	0.0443446	0.341597	2.24337	down	noncoding	long noncoding	Gold	NR_110514	EP300-AS1	RefSeq	1405	chr22	-	41581218	41593505	AGGCTGCGGGCGTCCTACCAGTGCCAGGACTGCCAGAGCGGGAGGAGCGCGGCGCGGGCC	101927279	intergenic							21.0474	42.1826	4.25768	5.42335	29.0188	17.457	16.6663	51.3807	44.6858	30.4813	4.95027	3.81236	4.01041	5.70219	5.52586	5.042
ASHGV40004765	0.00485756	0.155586	2.19307	down	noncoding	long noncoding	Gold	NR_125956	LOC101928565	RefSeq	629	chr1	-	168433351	168464882	GATCCACCTGGAATGGAAGAATATTAAGGAGAACAAGTCCTCATCTCTCCAAAGACCCTT	101928565	intergenic							12.2971	24.4021	3.52534	4.65829	11.0224	15.9754	9.8934	21.8616	30.4154	20.9293	3.60774	3.67009	3.29819	4.47765	4.98696	4.51026
ASHGV40015399	0.0190271	0.249975	2.18514	down	noncoding	long noncoding	Reliable	ENST00000557745	RP11-907D1.2	GENCODE	840	chr14	+	97582691	97587838	TTGAGCTGACTTAGAAATGACCACACTGGTGAGTTTCAATGTAAGTTGCACATACATAAA		intergenic							15.0367	29.7057	3.78659	4.91431	11.4292	21.5213	12.1597	24.5839	40.4715	24.0619	3.66006	4.12625	3.57345	4.63972	5.39601	4.7072
ASHGV40022586	0.000788669	0.0926226	2.17	down	noncoding	long noncoding	Reliable	ENST00000609775	RP11-370A5.2	GENCODE	533	chr18	-	20462787	20463320	GGGAGCAGAATTACTTAAAGACTTCATCTCTTCAATGCAGAGGATAGTAATTGATATTAC		intronic antisense	ENST00000583700	RBBP8		+	20378223	20516846	15.4549	30.2222	3.85836	4.97605	12.4528	18.2936	15.6185	33.1859	25.6568	31.8239	3.78104	3.8784	3.91563	5.07465	4.74634	5.10717
ASHGV40046916	0.000742253	0.0896792	2.16187	down	noncoding	long noncoding	Gold	NR_027374	LHFPL3-AS2	RefSeq	1911	chr7	-	104535074	104567092	AGATGAAATAGAGTAGAATTGAGAAAAGCAGTTTCTTAGACCTCCCTGTGAAGTTTTTCT	723809	intronic antisense	ENST00000401970	LHFPL3		+	103969147	104547201	74.6222	152.744	6.16653	7.27881	77.1856	82.1607	64.5204	154.615	165.607	138.008	6.3255	6.19667	5.97744	7.26968	7.39217	7.17459
ASHGV40021524	0.0287921	0.299681	2.15422	down	noncoding	long noncoding	Reliable	ENST00000577846	RP11-82O19.1	GENCODE	576	chr17	+	28088120	28114854	CGCGCGGCGGACTCACAGCTGGTTGATGGCGTTCTGCGAGATGACCGCGTTGGCGGAGAA		natural antisense	NM_001282131	SSH2		-	28000929	28088450	33.528	64.294	4.94071	6.04787	28.6872	25.4949	46.4019	67.3216	69.894	55.6664	4.93486	4.38625	5.50102	6.07977	6.16558	5.89827
ASHGV40036830	0.036102	0.318076	2.13423	down	noncoding	long noncoding	Reliable	ENST00000608133	RP11-523G9.3	GENCODE	789	chr3	+	175527551	175528340	GGAAATGAAGGCACCATTTAACAAACGTGTTCTGAATCATAATTTTCATGAGTTTGTACG		intergenic							14.3271	27.0919	3.7198	4.81351	17.3008	10.9112	14.7692	26.2096	31.8563	23.2098	4.22604	3.09809	3.83526	4.73274	5.05302	4.65477
ASHGV40034178	0.013068	0.215906	2.13099	down	noncoding	long noncoding	Gold	ENST00000449586	AC093415.2	GENCODE	726	chr3	-	37786922	37795488	GATGAAATAAACCCATCAGGTCTTTATCTATTTCCTACCCAATTACGAAAAGCAAAGGAG	101928153	intronic antisense	NM_002207	ITGA9	integrin subunit alpha 9	+	37493812	37861281	9.67106	18.5263	3.18843	4.27995	11.4915	9.30279	8.21892	19.2419	20.0829	16.2541	3.66824	2.84514	3.0519	4.29022	4.39165	4.15798
ASHGV40017904	0.00182601	0.112376	2.11683	down	noncoding	long noncoding	Reliable	ENST00000563960	RP11-1437A8.4	GENCODE	2486	chr16	-	33215093	33217783	ATGTTTATTTCTATATAATTCCTATTGAATCCTACTGGGCAGGACCCTTCTGGCCCCATC		intronic antisense	ENST00000398667	TP53TG3C		+	33204155	33264727	11.5909	22.0344	3.4493	4.53121	9.94213	11.809	13.0217	21.3907	21.1934	23.5192	3.46184	3.22073	3.66535	4.44777	4.47162	4.67423
ASHGV40014706	0.0310263	0.305621	2.1164	down	noncoding	long noncoding	Reliable	ENST00000547175	RP11-597A11.2	GENCODE	1493	chr14	+	20149578	20152898	GGGCACGGCTGCACAGTTATGTGATACTTGGAATGTCTTATGTATTGATGATGTGTTTGT		intergenic							13.9361	25.8808	3.67944	4.76106	16.0723	10.4405	15.2953	26.6927	26.4622	24.4875	4.12153	3.03129	3.88551	4.75671	4.79228	4.73418
ASHGV40004757	6.54177e-05	0.0576208	2.09669	down	noncoding	long noncoding	Gold	NR_125940	LOC101927412	RefSeq	591	chr1	+	81001439	81112473	TGTTTCCTGACAGCGTTTGTCAAGAAGGAAAGGTCGAAAATAAAGCACTGATGGAAATAC	101927412	intergenic							15.496	29.3254	3.86802	4.93614	13.8993	17.5251	15.0637	30.1282	31.3182	26.5297	3.92301	3.81781	3.86325	4.93225	5.03099	4.84518
ASHGV40043461	0.00106229	0.0941403	2.09665	down	noncoding	long noncoding	Gold	NR_110873	LOC101929555	RefSeq	2264	chr6	-	40846624	40991019	GGGGCAATCTAGCATTTATCTTTGAATTAGCATGAATTCTTATAGAAATGCAGTGTTGCT	101929555	intergenic							15.4395	29.3867	3.85945	4.92753	12.6757	18.2387	15.4043	33.6189	30.7826	23.7588	3.80683	3.87471	3.8968	5.09255	5.00321	4.68683
ASHGV40005868	0.037153	0.321817	2.09321	down	noncoding	long noncoding	Reliable	ENST00000438554	RP11-342M3.5	GENCODE	511	chr10	+	81142083	81169030	TCTGGGCATGTAACAGAGGCTAGTTTTTGCCAGGCTTGGGCCACTTGGGTGCTGGGCTTT		intronic antisense	ENST00000372333	ZCCHC24		-	81145792	81203975	12.64	23.0343	3.52797	4.59369	16.7263	13.1967	7.99704	25.3224	22.2639	21.5167	4.18059	3.38902	3.01431	4.68362	4.54533	4.55212
ASHGV40001708	0.00761185	0.177784	2.08402	down	noncoding	long noncoding	Reliable	ENST00000520588	RP11-642D21.2	GENCODE	649	chr8	-	106674579	106697993	ACCTCAGCAGGTGGAGTGCCGGAATTCAGGGGAATCTGTGTTATCATGCACACTCTTCTC		intronic antisense	NM_012082	ZFPM2	zinc finger protein, FOG family member 2	+	106331146	106816767	15.4345	28.6577	3.84548	4.90485	12.7927	14.2086	19.3021	28.6765	29.9117	27.3849	3.81846	3.49509	4.2229	4.85863	4.96435	4.89158
ASHGV40039150	0.0155369	0.231594	2.07701	down	noncoding	long noncoding	Gold	NR_002806	FAM13A-AS1	RefSeq	3210	chr4	+	89630939	89651254	ACTTGAGTCATAATTTGATGTTGAATCAGAGAGAACAACTGTTTGGGCTTATTTGCCTCA	285512	natural antisense	ENST00000511976	FAM13A		-	89648579	89978311	10.9692	20.3098	3.36287	4.41738	13.335	11.2455	8.32703	22.361	19.0292	19.5392	3.8701	3.14827	3.07023	4.5125	4.31893	4.42071
ASHGV40049609	1.38078e-05	0.0324322	2.07006	down	noncoding	long noncoding	Reliable	ENST00000517884	RP11-662G23.1	GENCODE	833	chr8	-	91818701	91871468	CAGAGGGTAGGACTCAGCTTGTAATATGTCCTCCATACATTTTATCGAACATTATTAATT		intronic antisense	NM_022351	NECAB1	N-terminal EF-hand calcium binding protein 1	+	91803920	91971630	54.7273	106.562	5.7165	6.76617	52.3539	59.1143	52.7138	109.578	110.21	99.899	5.78305	5.67707	5.6894	6.77068	6.80473	6.72311
ASHGV40004666	0.00787016	0.178458	2.02676	down	noncoding	long noncoding	Gold	NR_121635	FOXD3-AS1	RefSeq	547	chr1	-	63786554	63788129	CAGGGAGCGGGTGTGGACAAATCCTCCAAGATTTAACTTCCAAGAAAACCGGCGGCGGAG	100996301	bidirectional	NM_012183	FOXD3	forkhead box D3	+	63788729	63790797	65.155	122.681	5.94827	6.96745	71.2647	76.141	48.0592	118.352	129.241	120.451	6.21879	6.0735	5.55253	6.8892	7.03587	6.97729
ASHGV40003829	0.0450111	0.344003	1.96443	down	noncoding	long noncoding	Gold	NR_037936	LIPT1	RefSeq	1366	chr2	+	99771417	99779613	GAAGCCGCAGTTCAGTGATGGGGAGCCGTGTTTGGCAGTGCAGAGGTAGCGAAGTGTCCC	51601	exon sense-overlapping	ENST00000410042	MRPL30		+	99771460	99811761	26.0042	44.6678	4.561	5.5351	30.9807	31.2618	15.77	42.2053	44.4262	47.3717	5.04395	4.70891	3.93012	5.41616	5.51699	5.67216
ASHGV40004267	0.00442517	0.150275	1.96045	down	noncoding	long noncoding	Gold	NR_108081	LINC01176	RefSeq	728	chr7	+	30430500	30443670	TCTAGCAAGATCTGGCTGTTTAAAGTATTGGCTGGAGTTGGCGATGACTCAGCAGATCAA	100506516	intergenic							16.4323	29.2016	3.94366	4.91485	15.3603	19.7773	14.1593	31.5354	33.2477	22.8218	4.06001	3.99544	3.77553	5.00121	5.10957	4.63376
